# Supplementary material for: Association Between Obesity and Cardiovascular Outcomes: A Systematic Review and Meta-analysis of Mendelian Randomization Studies
Source: PubMed Central journal article supplement (PMC6324374; doi:10.1001/jamanetworkopen.2018.3788), 2018-11-16

## Supplementary Online Content

Riaz H, Khan MS, Siddiqi TJ, et al. Association between obesity and cardiovascular outcomes: a systematic review and meta-analysis of mendelian randomization studies. *JAMA Netw Open*. 2018;1(7):e183788. doi:10.1001/jamanetworkopen.2018.3788

**eTable 1. Search Strategy Used in Each Database Searched**

**eTable 2. Baseline Characteristics of the Included Trials**

**eFigure. Funnel Plot**

This supplementary material has been provided by the authors to give readers additional information about their work.

**eTable 1. Search Strategy Used in Each Database Searched**

| Database | Search Strategy                                                                                                                                                                                                                                                                                                                                                                                                                                                                                                                                                                                                                                                                                                                                                                                                                                                                                                                                                                                                                                                                                                                                                                                                                                                                                                                                                                                                                                                                                                                                                                                                                                                                                                                                                                                                                                                                                                                                                                                                                                                                                                                                                                                                                                                                                                                                                                                                                                                                                                                                                                                                                                                                                                                                                                                                                                                                                                                                                                                                                                                                                                                                                                                                                                                | Articles retrieved |
|----------|----------------------------------------------------------------------------------------------------------------------------------------------------------------------------------------------------------------------------------------------------------------------------------------------------------------------------------------------------------------------------------------------------------------------------------------------------------------------------------------------------------------------------------------------------------------------------------------------------------------------------------------------------------------------------------------------------------------------------------------------------------------------------------------------------------------------------------------------------------------------------------------------------------------------------------------------------------------------------------------------------------------------------------------------------------------------------------------------------------------------------------------------------------------------------------------------------------------------------------------------------------------------------------------------------------------------------------------------------------------------------------------------------------------------------------------------------------------------------------------------------------------------------------------------------------------------------------------------------------------------------------------------------------------------------------------------------------------------------------------------------------------------------------------------------------------------------------------------------------------------------------------------------------------------------------------------------------------------------------------------------------------------------------------------------------------------------------------------------------------------------------------------------------------------------------------------------------------------------------------------------------------------------------------------------------------------------------------------------------------------------------------------------------------------------------------------------------------------------------------------------------------------------------------------------------------------------------------------------------------------------------------------------------------------------------------------------------------------------------------------------------------------------------------------------------------------------------------------------------------------------------------------------------------------------------------------------------------------------------------------------------------------------------------------------------------------------------------------------------------------------------------------------------------------------------------------------------------------------------------------------------------|--------------------|
| MEDLINE  | (("obesity"[MeSH Terms] OR "obesity"[All Fields]) OR ("body mass index"[MeSH Terms] OR ("body"[All Fields] AND "mass"[All Fields] AND "index"[All Fields]) OR "body mass index"[All Fields]) OR ("body weight"[MeSH Terms] OR ("body"[All Fields] AND "weight"[All Fields]) OR "body weight"[All Fields]) OR ("adiposity"[MeSH Terms] OR "adiposity"[All Fields]) OR ("waist-hip ratio"[MeSH Terms] OR ("waist-hip"[All Fields] AND "ratio"[All Fields]) OR "waist-hip ratio"[All Fields]) OR ("waist"[All Fields] AND "hip"[All Fields] AND "ratio"[All Fields]) OR "waist to hip ratio"[All Fields]) OR ("waist circumference"[MeSH Terms] OR ("waist"[All Fields] AND "circumference"[All Fields]) OR "waist circumference"[All Fields])) AND (("myocardial infarction"[MeSH Terms] OR ("myocardial"[All Fields] AND "infarction"[All Fields]) OR "myocardial infarction"[All Fields]) OR (acute[All Fields] AND ("coronary disease"[MeSH Terms] OR ("coronary"[All Fields] AND "disease"[All Fields]) OR "coronary disease"[All Fields])) OR (("coronary vessels"[MeSH Terms] OR ("coronary"[All Fields] AND "vessels"[All Fields]) OR "coronary vessels"[All Fields]) OR ("coronary"[All Fields] AND "artery"[All Fields]) OR "coronary artery"[All Fields]) AND ("syndrome"[MeSH Terms] OR "syndrome"[All Fields])) OR ("coronary artery disease"[MeSH Terms] OR ("coronary"[All Fields] AND "artery"[All Fields] AND "disease"[All Fields]) OR "coronary artery disease"[All Fields]) OR ("coronary disease"[MeSH Terms] OR ("coronary"[All Fields] AND "disease"[All Fields]) OR "coronary disease"[All Fields]) OR ("coronary"[All Fields] AND "heart"[All Fields] AND "disease"[All Fields]) OR "coronary heart disease"[All Fields]) OR ("ischaemic heart disease"[All Fields] OR "myocardial ischemia"[MeSH Terms] OR ("myocardial"[All Fields] AND "ischemia"[All Fields]) OR "myocardial ischemia"[All Fields] OR ("ischemic"[All Fields] AND "heart"[All Fields] AND "disease"[All Fields]) OR "ischemic heart disease"[All Fields] OR "coronary artery disease"[MeSH Terms] OR ("coronary"[All Fields] AND "artery"[All Fields] AND "disease"[All Fields]) OR "coronary artery disease"[All Fields] OR ("ischemic"[All Fields] AND "heart"[All Fields] AND "disease"[All Fields])) OR ("cardiovascular system"[MeSH Terms] OR ("cardiovascular"[All Fields] AND "system"[All Fields]) OR "cardiovascular system"[All Fields] OR "cardiovascular"[All Fields]) OR ("stroke"[MeSH Terms] OR "stroke"[All Fields]) OR (("heart"[MeSH Terms] OR "heart"[All Fields] OR "cardio"[All Fields]) AND metabolic[All Fields] AND traits[All Fields])) AND ((Mendelian[All Fields] AND ("random allocation"[MeSH Terms] OR ("random"[All Fields] AND "allocation"[All Fields]) OR "random allocation"[All Fields] OR "randomization"[All Fields])) OR (instrumental-variable[All Fields] AND ("analysis"[Subheading] OR "analysis"[All Fields])) OR (("genetic therapy"[MeSH Terms] OR ("genetic"[All Fields] AND "therapy"[All Fields]) OR "genetic therapy"[All Fields]) OR "genetic"[All Fields]) AND ("association"[MeSH Terms] OR "association"[All Fields])) OR (causal[All Fields] AND ("association"[MeSH Terms] OR "association"[All Fields])))) | 1,753              |
| Scopus   | (( TITLE-ABS-KEY ( obesity ) OR TITLE-ABS-KEY ( body AND mass AND index ) OR TITLE-ABS-KEY ( body AND weight ) OR TITLE-ABS-KEY ( adiposity ) OR TITLE-ABS-KEY ( waist-to-hip AND ratio ) OR TITLE-ABS-KEY ( waist AND circumference )) AND (( TITLE-ABS-KEY ( myocardial AND infarction ) OR TITLE-ABS-KEY ( acute AND coronary AND disease ) OR TITLE-ABS-KEY ( coronary AND artery AND syndrome ) OR TITLE-ABS-KEY ( coronary AND artery AND disease ) OR TITLE-ABS-KEY ( coronary AND heart AND disease ) OR TITLE-ABS-KEY ( ischemic AND heart AND disease ) OR TITLE-ABS-KEY ( stroke ) OR TITLE-ABS-KEY ( cardiometabolic AND trait )) AND (( TITLE-ABS-KEY ( mendelian AND randomization ) OR TITLE-ABS-KEY ( instrumental-variable AND analysis ) OR TITLE-ABS-KEY ( genetic AND association ) OR TITLE-ABS-KEY ( causal AND association )) )                                                                                                                                                                                                                                                                                                                                                                                                                                                                                                                                                                                                                                                                                                                                                                                                                                                                                                                                                                                                                                                                                                                                                                                                                                                                                                                                                                                                                                                                                                                                                                                                                                                                                                                                                                                                                                                                                                                                                                                                                                                                                                                                                                                                                                                                                                                                                                                                         | 2,907              |

**eTable 2. Baseline Characteristics of the Included Trials**

| Studies     | Measure of obesity | Mean, (SD) BMI/ WHRadjB MI, kg/m <sup>2</sup> | Total sample | Age, mean y | Men (%) | Number of SNPs used           | Database                                                                                               | Cardio-metabolic Outcomes |                    |              |             | Definition of endpoints                                                                                                                                                                                                                     | Ascertainment of BMI/WHRadjB MI                                                              |
|-------------|--------------------|-----------------------------------------------|--------------|-------------|---------|-------------------------------|--------------------------------------------------------------------------------------------------------|---------------------------|--------------------|--------------|-------------|---------------------------------------------------------------------------------------------------------------------------------------------------------------------------------------------------------------------------------------------|----------------------------------------------------------------------------------------------|
|             |                    |                                               |              |             |         |                               |                                                                                                        | CAD, (%)                  | Heart Failure, (%) | T2DM, (%)    | Stroke, (%) |                                                                                                                                                                                                                                             |                                                                                              |
| Lyall, 2017 | BMI                | 27.4(4.8)                                     | 119,859      | 57          | 47      | 93                            | UK Biobank (2006-2010)                                                                                 | 5760 (4.8)                | N/A                | 6290 (5.3)   | 1958 (1.6)  | CAD defined as either angina or myocardial infarction                                                                                                                                                                                       | Body mass index was derived from weight in kilograms divided by height in meters squared     |
| Dale, 2017  | BMI / WHRadjB MI   | BMI: 27.4(4.6)<br><br>WHRadjB MI: 0.89 (0.13) | 213,556      | 64          | N/A     | BMI: 97<br><br>WHRadjB MI: 49 | 14 prospective studies, CAD from CARDIoGRAMplusC4D, Ischemic Stroke from METASTROKE, T2DM from DIAGRAM | 66842 (29.1)              | N/A                | 34840 (23.3) | N/A         | UCLEB studies defined CHD as fatal or non-fatal myocardial infarction, or a coronary revascularization procedure, but excluding angina. CARDIoGRAMplusC4D used standard criteria for defining cases of CAD T2DM definition follows DIAGRAM. | waist circumference, hip circumference and weight were used to calculate BMI and WHRadjB MI. |

**eTable 2. Baseline Characteristics of the Included Trials (Continued)**

| Studies     | Measure of obesity | Mean, (SD) BMI/WHRadjBMI, kg/m <sup>2</sup> | Total sample | Age, mean y | Men (%) | Number of SNPs used | Database                                                                                                 | Cardio-metabolic Outcomes |            |              |            | Definition of endpoints                                                                                           | Ascertainment of BMI/WHRadjBMI                                                                                                          |
|-------------|--------------------|---------------------------------------------|--------------|-------------|---------|---------------------|----------------------------------------------------------------------------------------------------------|---------------------------|------------|--------------|------------|-------------------------------------------------------------------------------------------------------------------|-----------------------------------------------------------------------------------------------------------------------------------------|
|             |                    |                                             |              |             |         |                     |                                                                                                          |                           |            |              |            |                                                                                                                   |                                                                                                                                         |
| Emdin, 2017 | WHRadjBMI          | 27.5 (4.8)                                  | 768,269      | 57          | 48      | 48                  | Summary level data from 6 GWAS consortia (2007-2015), DIAGRA, CARDIoGRAMplusC4D, UK Biobanks (2007-2011) | 66440 (22.4)              | 586 (0.52) | 40530 (15.5) | 2035 (1.8) | (International Statistical Classification of Diseases and Related Health Problems, Tenth Revision codes I21-I23). | WHR adjusted for BMI was derived in the UK Biobank through inverse normal transformation of WHR after adjustment for age, sex, and BMI. |
| Hagg, 2015  | BMI                | 25.9 (4.5)                                  | 22,193       | 50          | N/A     | 32                  | 9 prospective cohorts within the ENGAGE Consortium, CARDIoGRAMplusC4D                                    | 3062 (13.8)               | N/A        | N/A          | N/A        | Pre-specified criteria set by each study                                                                          | Body mass index was derived from weight in kilograms divided by height in meters squared                                                |

**eTable 2. Baseline Characteristics of the Included Trials (Continued)**

| Studies                                                                                                                                                                                                                                                                                                                                                                                                                                                                                                                                                                                             | Measure of obesity | Mean, (SD) BMI/ WHRadjBMI, kg/m <sup>2</sup> | Total sample | Age, mean y | Men (%) | Number of SNPs used | Database                                                       | Cardio-metabolic Outcomes |       |             |             | Definition of endpoints                                                                          | Ascertainment of BMI/WHRadjBMI                                                           |
|-----------------------------------------------------------------------------------------------------------------------------------------------------------------------------------------------------------------------------------------------------------------------------------------------------------------------------------------------------------------------------------------------------------------------------------------------------------------------------------------------------------------------------------------------------------------------------------------------------|--------------------|----------------------------------------------|--------------|-------------|---------|---------------------|----------------------------------------------------------------|---------------------------|-------|-------------|-------------|--------------------------------------------------------------------------------------------------|------------------------------------------------------------------------------------------|
|                                                                                                                                                                                                                                                                                                                                                                                                                                                                                                                                                                                                     |                    |                                              |              |             |         |                     |                                                                |                           |       |             |             |                                                                                                  |                                                                                          |
| Holmes, 2014                                                                                                                                                                                                                                                                                                                                                                                                                                                                                                                                                                                        | BMI                | 27.5(1)                                      | 34,538       | 60          | 35      | 14                  | 8 cohorts that been genotyped by the Human CVD BeadArray       | 6073 (17.6)               | N/A   | 4407 (13.5) | 3813 (12.5) | Pre-specified criteria set by each study                                                         | Body mass index was derived from weight in kilograms divided by height in meters squared |
| Nordestgaard, 2012                                                                                                                                                                                                                                                                                                                                                                                                                                                                                                                                                                                  | BMI                | N/A                                          | 75,627       | N/A         | N/A     | 9                   | Two population based and one-case-control study in Copenhagen  | 11,056                    | N/A   | N/A         | N/A         | World Health Organization International Classification of Diseases: ICD8 410–414; ICD10 I20–I25) | Body mass index was derived from weight in kilograms divided by height in meters squared |
| Fall, 2013                                                                                                                                                                                                                                                                                                                                                                                                                                                                                                                                                                                          | BMI                | N/A                                          | 198,502      | N/A         | N/A     | 24                  | 36 population-based studies of individuals of European descent | 10,372                    | 6,068 | 20,804      | 4,003       | Pre-specified criteria set by each study                                                         | Body mass index was derived from weight in kilograms divided by height in meters squared |
| <p><b>Abbreviations:</b> BMI: body mass index; WHRadjBMI: waist-hip ratio adjusted for BMI; CARDIOGRAMplusC4D: Coronary Artery Disease Genome-Wide Replication and Meta-analysis plus the Coronary Artery Disease Genetics Consortium; DIAGRAM: Diabetes Genetics Replication and Meta-analysis; SNP: single-nucleotide polymorphism; CHD: coronary heart disease; MR: mendelian randomization; N/A: not available; SD: standard deviation; CAD: coronary artery disease; T2DM: type 2 diabetes mellitus; ICD: international classification of diseases; GWAS: genome-wide association studies.</p> |                    |                                              |              |             |         |                     |                                                                |                           |       |             |             |                                                                                                  |                                                                                          |

eFigure. Funnel Plot

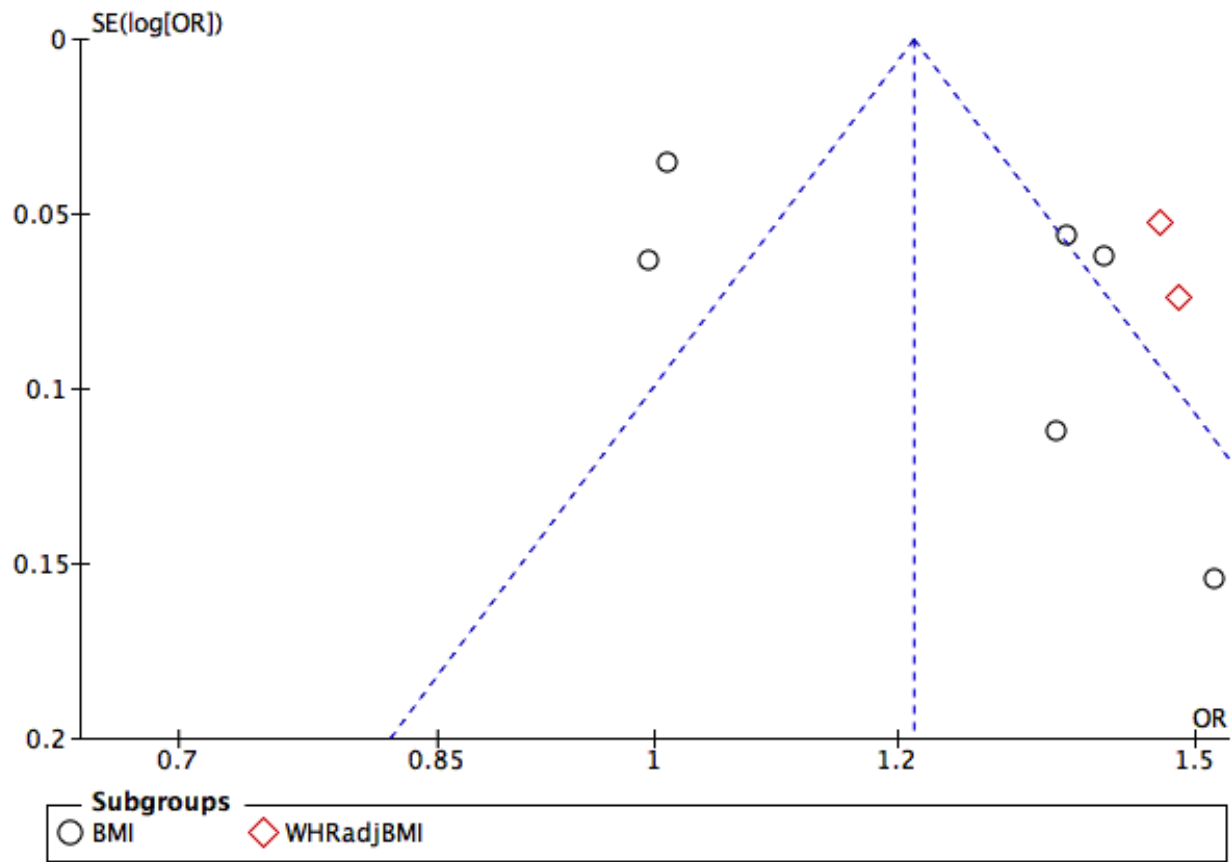

Supplement: jamanetwopen-1-e183788-s001.pdf [file jamanetwopen-1-e183788-s001.pdf]
